# Supplementary material for: Rapid modulation of interscapular brown adipose tissue mitochondrial activity by ketosis induced by 1,3‐butanediol administration to rats
Source: PubMed Central journal article supplement (PMC11583952; doi:10.1096/fj.202401592rr), 2024-11-22
Supplement: FSB2-38-e70195-s002.pdf [file FSB2-38-e70195-s002.pdf]

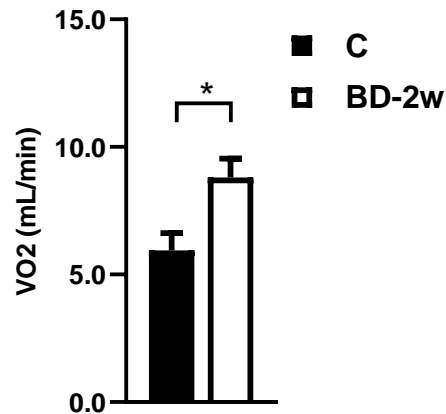

**Effect of BD administration for 2 weeks on whole rat metabolic rate**

Values represent the mean  $\pm$  SEM of 3 different rats \* $p < 0.05$  vs C

Oxygen consumption (VO<sub>2</sub>) measurements were made using a four-chamber, indirect, open-circuit calorimeter Oxymax system (Pan Lab, Cornella, Barcelona, Spain) with one rat per chamber. After a 1-h period of adaptation to the metabolic chamber, VO<sub>2</sub> was measured in individual rats at 15-min intervals for 4 h.

# OXIDATIVE PHOSPHORYLATION

Up-regulated proteins

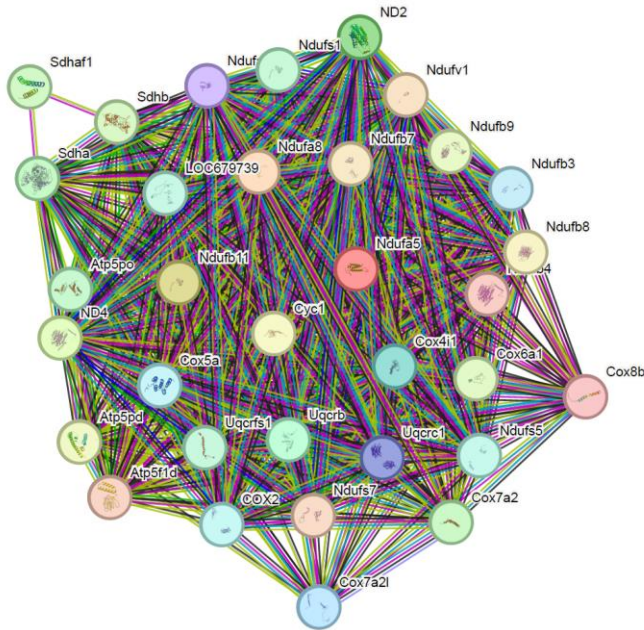

## OXIDATIVE PHOSPHORYLATION

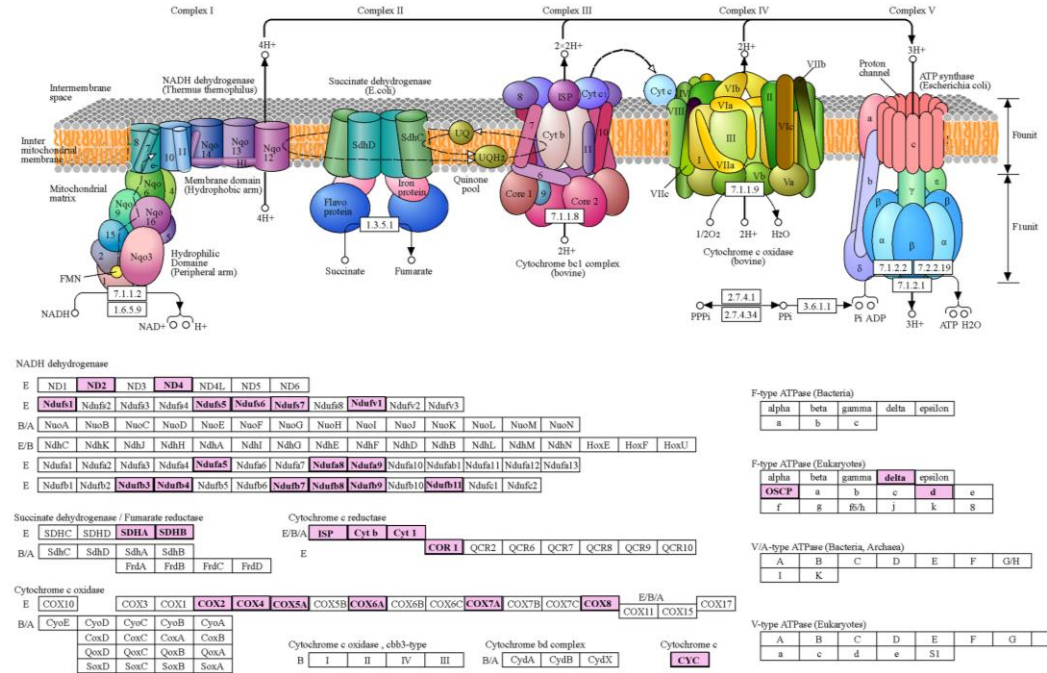

Supplementary Fig.1 String network analysis of regulated proteins involved in oxidative phosphorylation (A) and KEGGs pathways analysis in BD-2w. vs C. The up-regulated proteins are depicted in pink

# PROPANOATE METABOLISM

## Up-regulated proteins

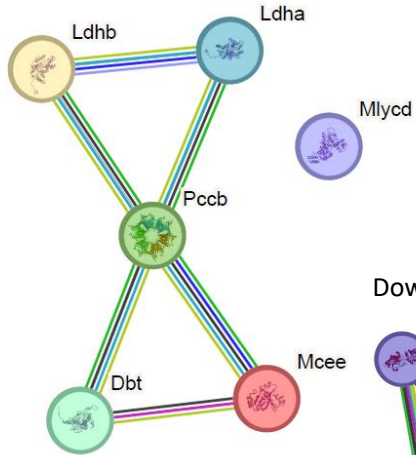

## Down-regulated proteins

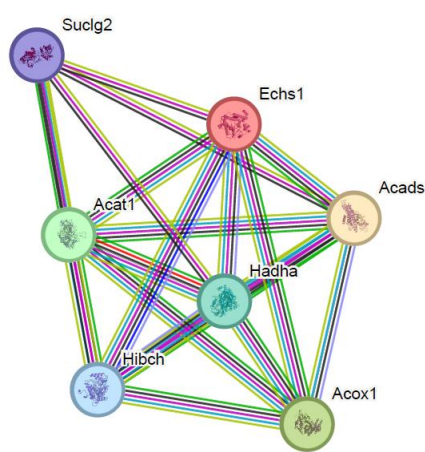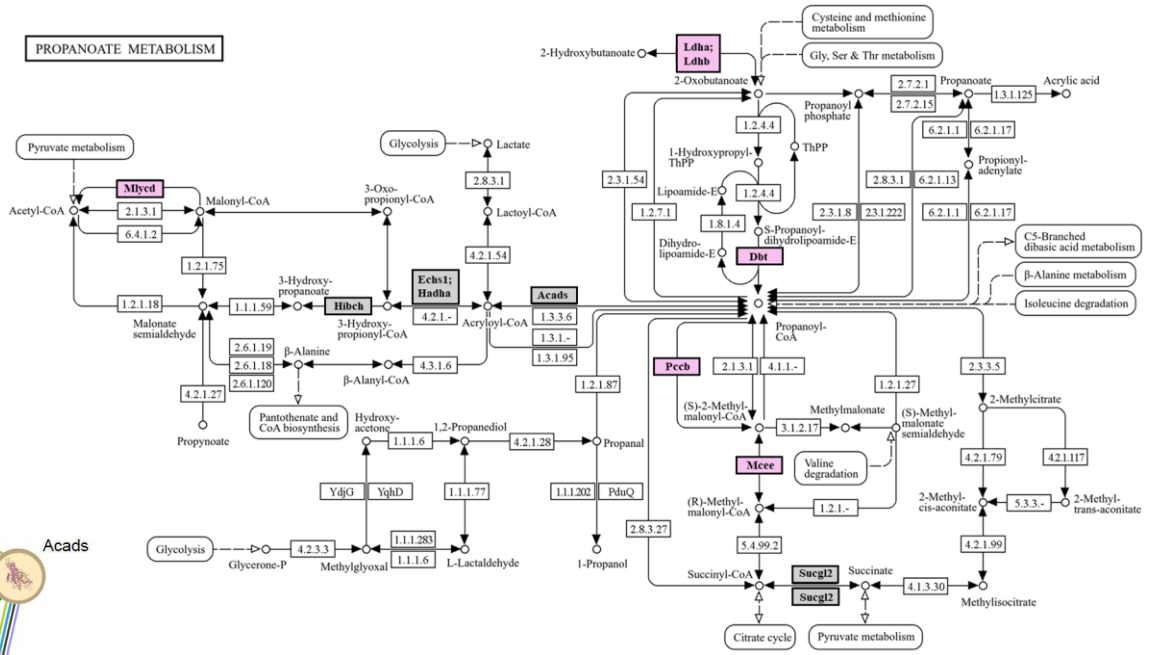

String network analysis (A) and KEGGs analysis (B) of An) of regulated proteins involved in in propanoate metabolism in BD-2w vs C. In the KEGG analysis (B) the up-regulated proteins are depicted in pink, the down-regulated proteins are depicted in grey

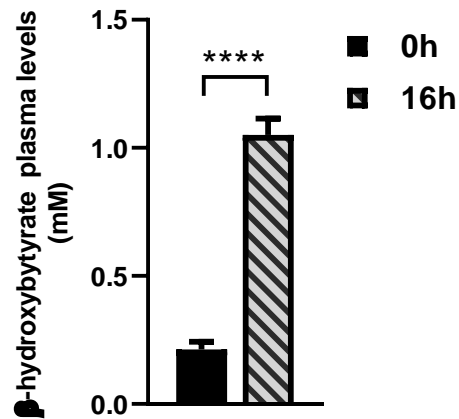

Plasma levels of  $\beta$ -OHB detected in rats after 16 hours of food removal. Values represent mean  $\pm$  SE of 4 animals. Two-tailed Student test was performed. \*\*\*\* $P < 0.0001$

Supplementary Fig 4
